# Supplementary material for: Nanofibrous Online Solid-Phase Extraction Coupled with Liquid Chromatography for the Determination of Neonicotinoid Pesticides in River Waters
Source: MDPI journal article supplement (doi:10.3390/membranes12070648), 2022-06-24
Supplement: s1 [file s1]

# Nanofibrous Online Solid-Phase Extraction Coupled with Liquid Chromatography for the Determination of Neonicotinoid Pesticides in River Waters

Ivana H. Šrámková <sup>1,\*</sup>, Burkhard Horstkotte <sup>1</sup>, Laura Carbonell-Rozas <sup>2</sup>, Jakub Erben <sup>3</sup>, Jiří Chvojka <sup>3</sup>, Francisco J. Lara <sup>2</sup>, Ana M. García-Campaña <sup>2</sup> and Dalibor Šatínský <sup>1</sup>

<sup>1</sup> Department of Analytical Chemistry, Faculty of Pharmacy in Hradec Králové, Charles University, Heyrovského 1203, 500 05 Hradec Králové, Czech Republic; horstkob@faf.cuni.cz (B.H.); satinsky@faf.cuni.cz (D.Š.)

<sup>2</sup> Department of Analytical Chemistry, Faculty of Sciences, University of Granada, Av. Fuente Nueva s/n, E-18071 Granada, Spain; rozas@ugr.es (L.C.-R.); frjlara@ugr.es (F.J.L.); amgarcia@ugr.es (A.M.G.-C.)

<sup>3</sup> Department of Nonwovens and Nanofibrous Materials, Faculty of Textile Engineering, Technical University of Liberec, Studentská 2, 461 17 Liberec, Czech Republic; jakub.erben@tul.cz (J.E.); jiri.chvojka@tul.cz (J.C.)

\* Correspondence: sramkovai@faf.cuni.cz; Tel.: +420-495-067-183

**Citation:** Šrámková, I.H.; Horstkotte, B.; Carbonell-Rozas, L.; Erben, J.; Chvojka, J.; Lara, F.J.; García-Campaña, A.M.; Šatínský, D. Nanofibrous Online Solid-Phase Extraction Coupled with Liquid Chromatography for the Determination of Neonicotinoid Pesticides in River Waters. *Membranes* **2022**, *12*, 648. <https://doi.org/10.3390/membranes12070648>

Academic Editors: Guorong Xu  
Rasel Das and Michiaki Matsumoto

Received: 26 February 2022

Accepted: 20 June 2022

Published: 24 June 2022

**Publisher's Note:** MDPI stays neutral with regard to jurisdictional claims in published maps and institutional affiliations.

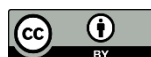

**Copyright:** © 2022 by the authors. Licensee MDPI, Basel, Switzerland. This article is an open access article distributed under the terms and conditions of the Creative Commons Attribution (CC BY) license (<https://creativecommons.org/licenses/by/4.0/>).

## Content

|                                                                                                                                                                                   |   |
|-----------------------------------------------------------------------------------------------------------------------------------------------------------------------------------|---|
| Table S1. Chemical structure and properties of the analytes. ....                                                                                                                 | 2 |
| Figure S1. Chemical structure of PID nanofibers, commercial material P84®. ....                                                                                                   | 2 |
| Table S2. Conditions for electrospinning fabrication of PID nanofibers. ..                                                                                                        | 2 |
| Figure S2. SEM images of the PID nanofibrous sorbent. ....                                                                                                                        | 3 |
| Figure S3. Fiber and pore diameter distributions of the PID nanofibrous sorbent. ....                                                                                             | 3 |
| Figure S4. SEM image of the contact angle measurements of PID nanofibers. ....                                                                                                    | 3 |
| Figure S5. Thermic characteristics of PID nanofibers. (a) DSC curve for the glass transition temperatures determination. (b) TGA analysis of the point of thermic stability ..... | 4 |
| Table S3. Material characteristics of PID nanofibers. ....                                                                                                                        | 4 |
| Table S4. Time program for gradient elution. ....                                                                                                                                 | 4 |
| Table S5. Routine “Syringe cleaning”. ....                                                                                                                                        | 5 |
| Table S6. LIS-method for automated nanofibrous online SPE. ....                                                                                                                   | 5 |
| Figure S6. Effect of sample volume on the analytical response. ....                                                                                                               | 6 |
| Table S7. Obtained peak characteristics (5 µg L <sup>-1</sup> , n = 6). ....                                                                                                      | 7 |

**Table S1.** Chemical structure and properties of the analytes.

| Analyte      | Abbreviation | Formula                                                                              | logP  | pK <sub>a</sub> of bases* | Water solubility [mg·L <sup>-1</sup> ] |
|--------------|--------------|--------------------------------------------------------------------------------------|-------|---------------------------|----------------------------------------|
| Thiametoxam  | TMX          | 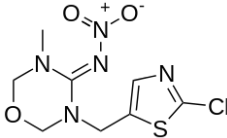   | 0.16  | 0.40                      | 4100                                   |
| Clothianidin | CLD          |    | 0.732 | 0.44<br>-0.79             | 340                                    |
| Imidacloprid | IMI          |    | 0.33  | 5.28<br>-0.44             | 610                                    |
| Acetamiprid  | ACP          |   | 1.55  | 4.16<br>-0.21             | 2950                                   |
| Thiacloprid  | TCP          |  | 2.2   | 1.62<br>-0.19             | 184                                    |

\* [www.chemicalize.com](http://www.chemicalize.com).

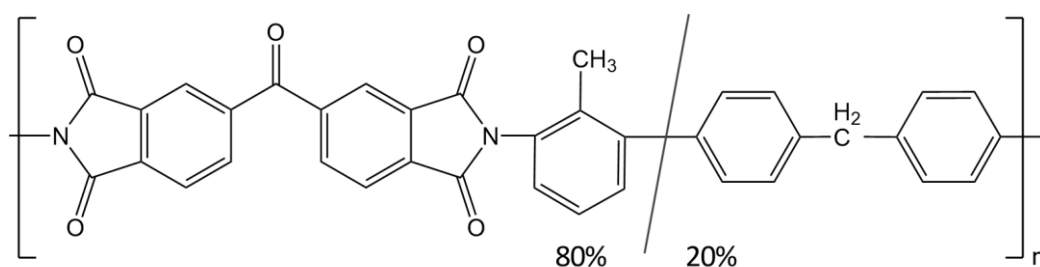

**Figure S1.** Chemical structure of PID nanofibers, commercial material P84®.

**Table S2.** Conditions for electrospinning fabrication of PID nanofibers.

|                                   |                         |
|-----------------------------------|-------------------------|
| Distance electrode to collector   | 200 mm                  |
| Spinning electrode charge         | +45 kV                  |
| Collector charge                  | -10 kV                  |
| Speed of polymer application      | 350 mm s <sup>-1</sup>  |
| Nozzle orifice size               | 0.7 mm                  |
| Speed of support textile movement | 35 mm min <sup>-1</sup> |
| Ambient temperature               | 25 °C                   |
| Humidity                          | 10 %rel. humidity       |

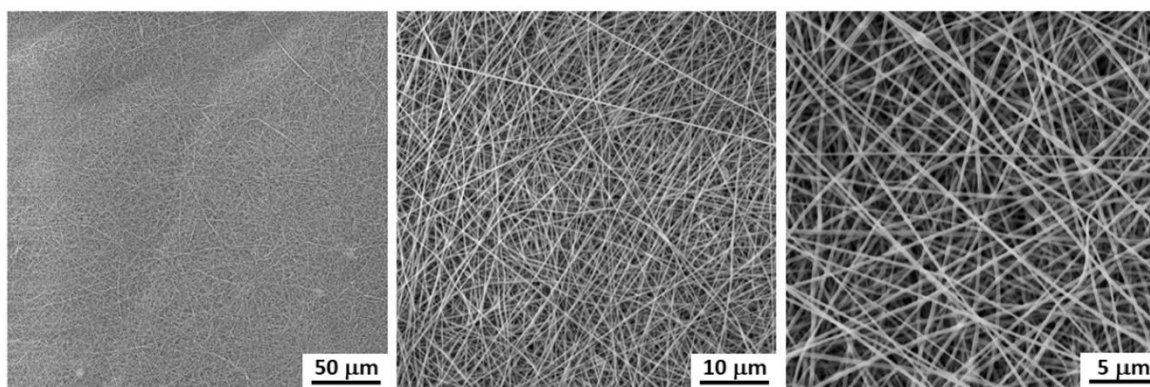

**Figure S2.** SEM images of the PID nanofibrous sorbent.

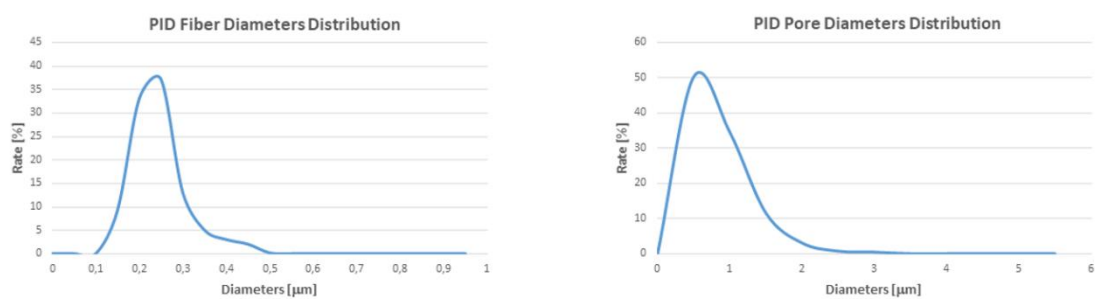

**Figure S3.** Fiber and pore diameter distributions of the PID nanofibrous sorbent.

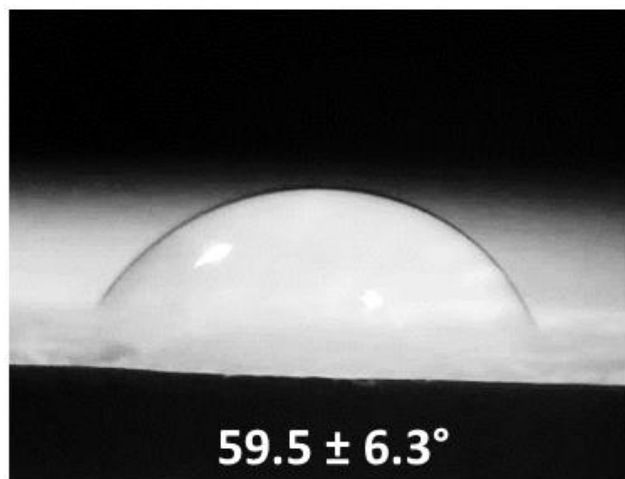

**Figure S4.** SEM image of the contact angle measurements of PID nanofibers.

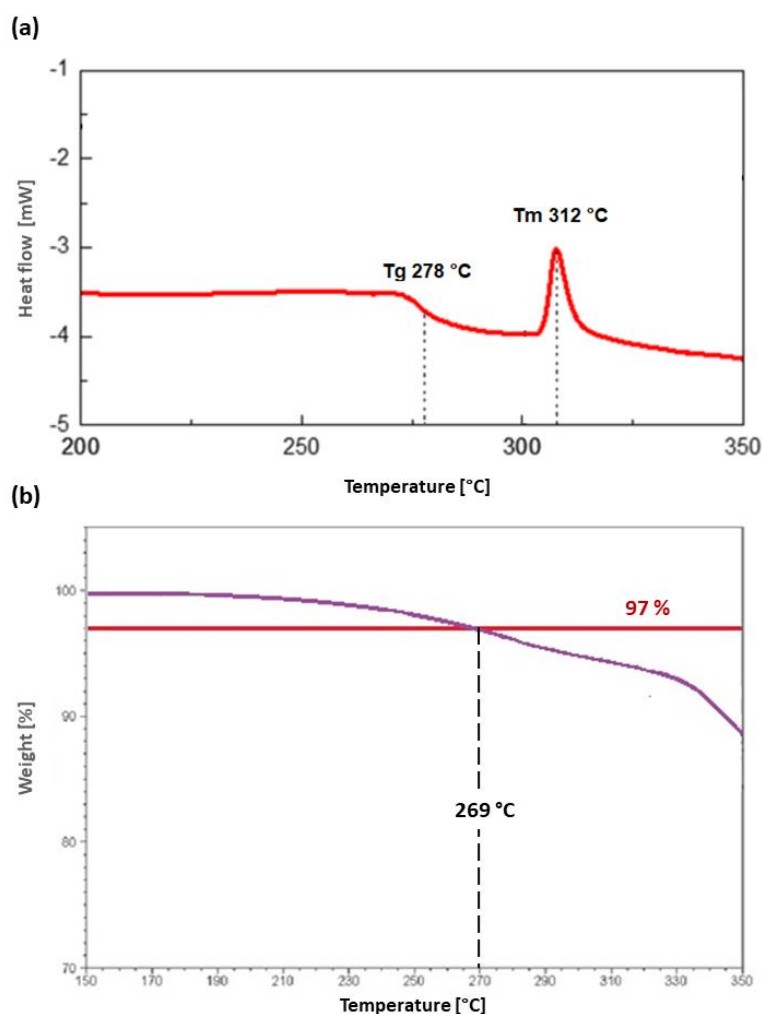

**Figure S5.** Thermal characteristics of PID nanofibers. (a) DSC curve for the glass transition temperatures determination. (b) TGA analysis of the point of thermic stability.

**Table S3.** Material characteristics of PID nanofibers.

|                                |                                      |
|--------------------------------|--------------------------------------|
| Molecular weight of PID        | 60 000 g mol <sup>-1</sup>           |
| Surface density                | 3 g m <sup>-2</sup>                  |
| Thickness of mat               | 60 µm                                |
| Production rate                | 1.93 g h <sup>-1</sup>               |
| Fiber diameters                | 0.234 ± 0.06 µm                      |
| Pore diameters                 | 0.54 ± 0.09 µm                       |
| Porosity                       | 82.69 %                              |
| Contact angle                  | 59.50 ± 6.30 °                       |
| Surface area                   | 16.95 m <sup>2</sup> g <sup>-1</sup> |
| Thermal degradation            | 269°C                                |
| Glass transmission temperature | 278°C                                |
| Melting point                  | 312°C                                |

**Table S4.** Time program for gradient elution.

|                    |     |     |      |      |      |     |      |      |
|--------------------|-----|-----|------|------|------|-----|------|------|
| Time [min]         | 0.0 | 1.0 | 6.0  | 6.5  | 7.5  | 8.5 | 11.0 | 14.0 |
| Mobile phase B [%] | 0   | 0   | 15   | 45   | 45   | 60  | 0    | 0    |
| Content of ACN [%] | 10  | 10  | 20.5 | 41.5 | 41.5 | 52  | 10   | 10   |

**Table S5.** Routine “Syringe cleaning”.

| Instruction                                                      | Comment                                                       |
|------------------------------------------------------------------|---------------------------------------------------------------|
| Selection valve to position „PORT“                               | Selection of respective valve port of aimed cleaning solution |
| Aspirate 500 µL at 10 mL/min from head valve position OUT        | Aspiration of cleaning solution                               |
| Relay 1 in ON<br>Wait 5 s<br>Relay 1 in OFF                      | Activate for 5 s                                              |
| Empty syringe at 10 mL/min to head valve position IN<br>Wait 1 s | Discharge to waste                                            |

**Table S6.** LIS-method for automated nanofibrous online SPE.

| Instruction                                                                                                                               | Comment                                                                                     |
|-------------------------------------------------------------------------------------------------------------------------------------------|---------------------------------------------------------------------------------------------|
| Selection valve to position 4<br>Aspirate 1000 µL at 10 mL/min from head valve position OUT<br>Wait 1 s                                   | Aspiration of acetonitrile                                                                  |
| Injection valve to position LOAD<br>Empty at 0.75 mL/min to head valve position MIDDLE<br>Wait 3 s                                        | Washing nanofibers with acetonitrile                                                        |
| Selection valve to position 2<br>Aspirate 1000 µL at 10 mL/min from head valve position OUT<br>Wait 1 s                                   | Aspiration of water                                                                         |
| Empty syringe at 0.75 µL/min to head valve position MIDDLE<br>Wait 3 s                                                                    | Washing nanofibers with water                                                               |
| Selection valve to position 3<br>Aspirate 200 µL at 10 mL/min from head valve position OUT<br>Relay 1 in ON<br>Wait 2 s<br>Relay 1 in OFF | Cleaning holding coil and syringe head valve with buffer<br>Activate stirring for 2 s       |
| Empty syringe at 10 mL/min to head valve position IN<br>Wait 1 s                                                                          | Discharge buffer remains from syringe                                                       |
| Selection valve to position 3<br>Aspirate 300 µL at 10 mL/min from head valve position OUT<br>Wait 2 s                                    | Buffer aspiration                                                                           |
| Relay 1 in ON                                                                                                                             | Activate stirring                                                                           |
| Activate stirring<br>Selection valve to position 5<br>Aspirate 2000 µL at 10 mL/min<br>Wait 3 s                                           | Aspiration of remains of buffer from holding coil and sample, mixing of solution in-syringe |
| Selection valve to position 8<br>Aspirate 100 µL at 10 mL/min<br>Wait 1 s                                                                 | Empty remains of sample from the HC into the syringe with air                               |
| Relay 1 in OFF                                                                                                                            | Deactivate stirring                                                                         |

|                                                                                                            |                                    |
|------------------------------------------------------------------------------------------------------------|------------------------------------|
| Empty syringe at 0.5 mL/min to head valve position<br>MIDDLE<br>Wait 3 s                                   | Sample loading onto nano-fibers    |
| PORT = 2<br>Call routine „Syringe cleaning” (2x)                                                           | Cleaning the syringe 2x with water |
| Selection valve to position 3<br>Aspirate 25 µL at 1 mL/min from head valve position<br>OUT<br>Wait 3 s    | Buffer aspiration                  |
| Relay 1 in ON                                                                                              | Activation of stirring             |
| Selection valve to position 6<br>Aspirate 1000 µL at 10 mL/min from head valve position<br>OUT<br>Wait 2 s | Water aspiration for washing       |
| Relay 1 in OFF                                                                                             | Deactivation of stirring           |
| Dispense 2000 µL at 0.75 mL/min to head valve position<br>MIDDLE<br>Wait 3 s                               | Washing of nanofibers              |
| Injection valve to position INJECT                                                                         |                                    |
| Relay 3 in ON for 1 s                                                                                      | Triggering of HPLC                 |
| Relay 2 in ON for 1 s                                                                                      | Initiation of Gradient             |
| Wait 300 s                                                                                                 | Wait for method restarting         |

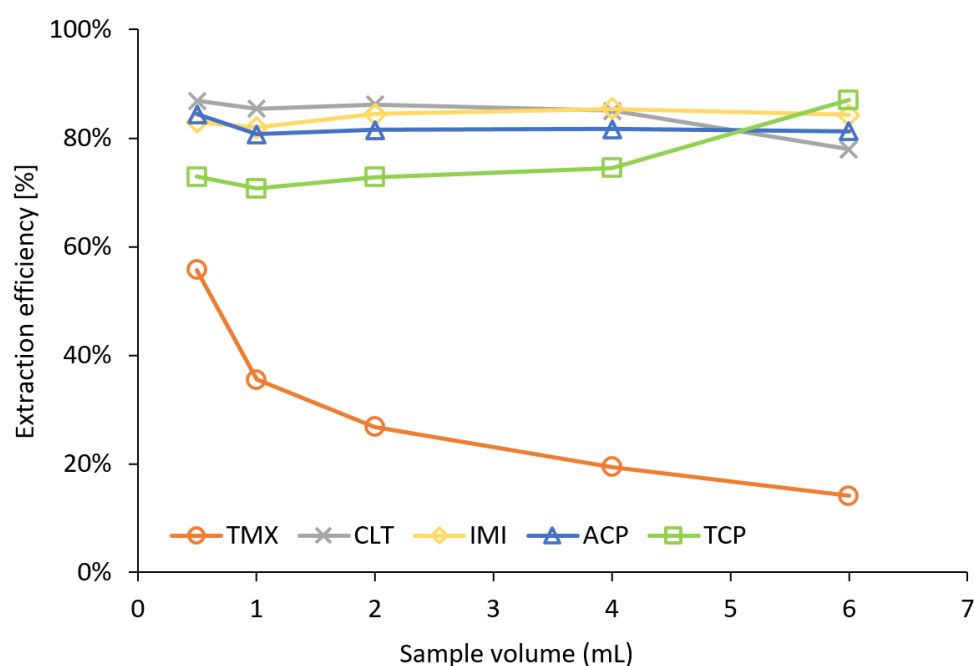

**Figure S6.** Effect of sample volume on the analytical response. Conditions: 3 layers of PID NF; sample: 1, 2, 4 or 6 mL, 1 mg·L<sup>-1</sup>, pH adjusted to 3; washing with 1 mL water, elution with 1 mL ACN 100%; off-line measurement, injection volume: 10 µL.

**Table S7.** Obtained peak characteristics ( $5 \mu\text{g} \cdot \text{L}^{-1}$ ,  $n = 6$ ).

| <b>Analyte</b> | <b><math>t_R \pm \text{RSD}\%</math></b> | <b>Tailing factor</b> | <b><math>R_s</math></b> | <b>Width (5%)<br/>[min]</b> |
|----------------|------------------------------------------|-----------------------|-------------------------|-----------------------------|
| TMX            | $7.73 \pm 4.59\%$                        | 1.79                  | -                       | 0.242                       |
| CLT            | $8.49 \pm 6.03\%$                        | 1.78                  | 4.45                    | 0.235                       |
| IMI            | $8.85 \pm 6.13\%$                        | 1.57                  | 2.14                    | 0.235                       |
| ACP            | $9.34 \pm 5.31\%$                        | 1.41                  | 2.94                    | 0.203                       |
| TCP            | $10.58 \pm 2.57\%$                       | 1.41                  | 8.29                    | 0.192                       |
